# Supplementary material for: Human Intestinal Organoids Recapitulate Enteric Infections of Enterovirus and Coronavirus
Source: PubMed Central journal article supplement — Stem Cell Reports. 2021 Feb 12;16(3):493–504. doi: 10.1016/j.stemcr.2021.02.009 (PMC7940440; doi:10.1016/j.stemcr.2021.02.009), 2021-02-12
Supplement: mmc1.pdf [file mmc1.pdf]

**Stem Cell Reports, Volume 16**

**Supplemental Information**

**Human Intestinal Organoids Recapitulate Enteric Infections of Enterovirus and Coronavirus**

**Xiaoyu Zhao, Cun Li, Xiaojuan Liu, Man Chun Chiu, Dong Wang, Yuxuan Wei, Hin Chu, Jian-Piao Cai, Ivy Hau-Yee Chan, Kenneth Kak-Yuen Wong, Jasper Fuk-Woo Chan, Kelvin Kai-Wang To, Kwok Yung Yuen, and Jie Zhou**

**Supplementary Information**

**(Ref No. STEM-CELL-REPORTS-D-20-00707R1)**

**Human intestinal organoids recapitulate enteric infections of enterovirus and coronavirus**

Xiaoyu Zhao<sup>1,2</sup>, Cun Li<sup>2</sup>, Xiaojuan Liu<sup>2</sup>, Man Chun Chiu<sup>2</sup>, Dong Wang<sup>2</sup>, Yuxuan Wei<sup>2</sup>, Hin Chu<sup>1,2</sup>, Jian-Piao Cai<sup>2</sup>, Ivy Hau-Yee Chan<sup>3</sup>, Kenneth Kak-Yuen Wong<sup>3</sup>, Jasper Fuk-Woo Chan<sup>1,2,4</sup>, Kelvin Kai-Wang To<sup>1,2,4</sup>, Kwok Yung Yuen<sup>1,2,4,5</sup>, Jie Zhou<sup>1,2,5\*</sup>

**Figure S1. Representative images of human intestinal organoids in expansion and different differentiation media. Related to Figure 1.**

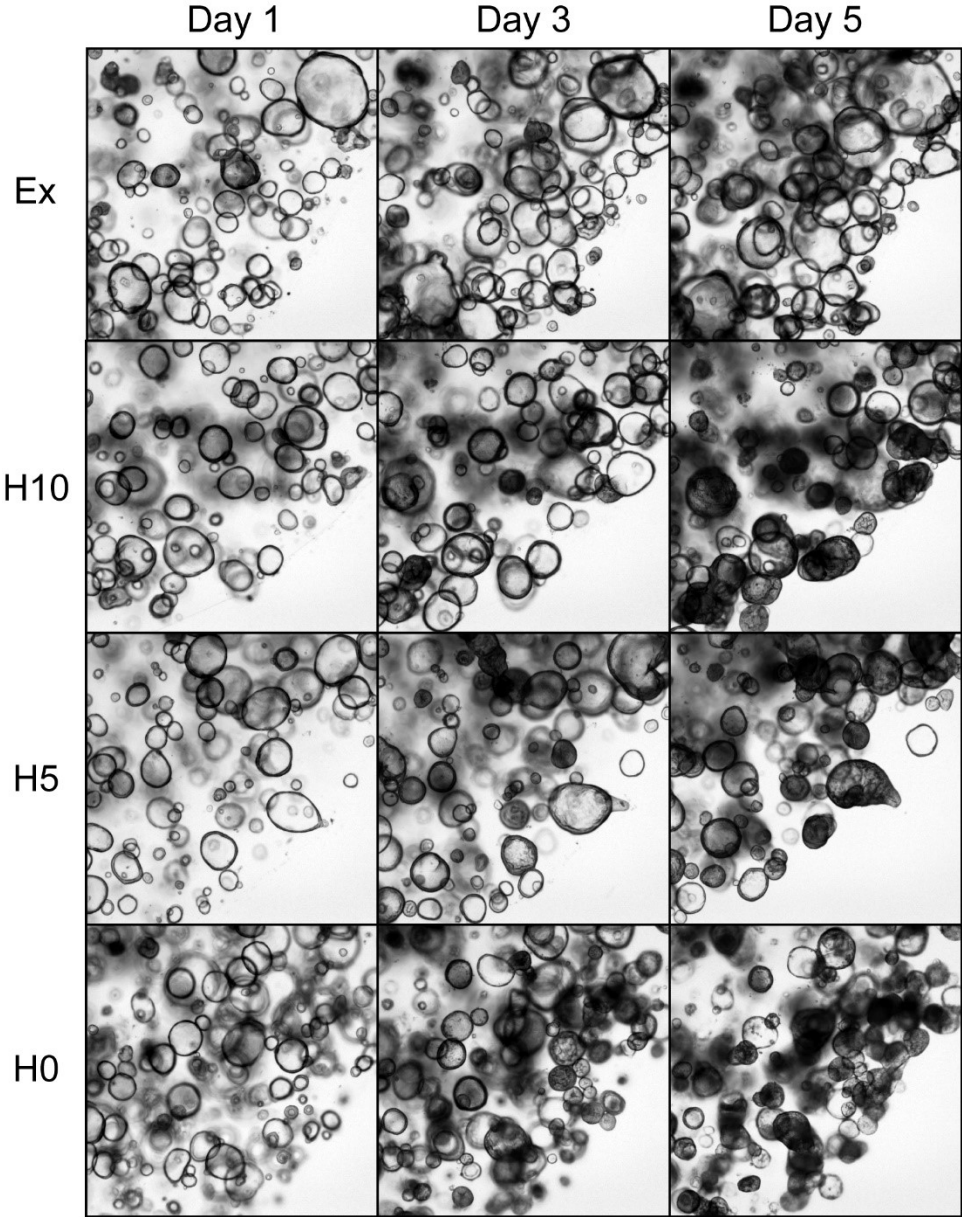

**Figure S2. Comparable infection rate of SARS-CoV and SARS-CoV-2 in the differentiated human enteroids. Related to Figure 5.** At 10 hours after inoculation with a MOI of 2, SARS-CoV- and SARS-CoV-2- infected organoids were fixed, stained with an  $\alpha$ -dsRNA and applied to flow cytometry. (A) The histogram shows the result of one representative experiment. (B) Mean and SD of three independent experiments are presented.

**A**

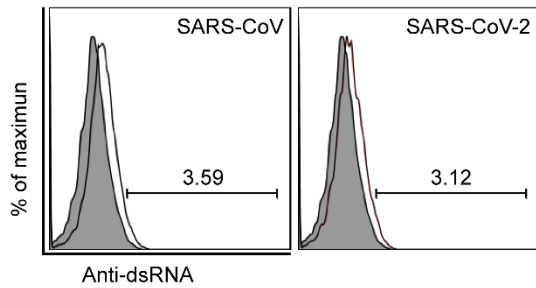

**B**

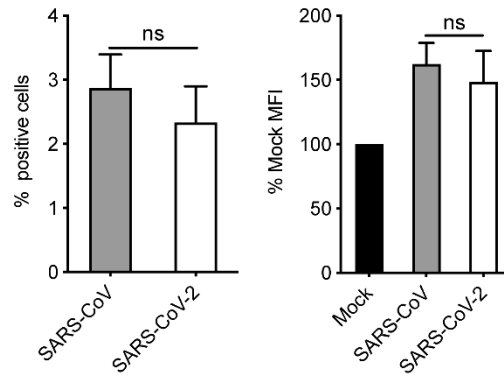

**Table S1. The primer sequences for RT-qPCR assay. Related to all figures.**

| Gene          | Sequence                                                                         | Gene          | Sequence                                                                 |
|---------------|----------------------------------------------------------------------------------|---------------|--------------------------------------------------------------------------|
| <i>GAPDH</i>  | (F) 5'-ATTCACCCATGGCAAATTC-3'<br>(R) 5'-CGCTCCTGGAAAGATGGTGAT-3'                 | <i>IFI44L</i> | (F) 5'-AACCTAGACGACATAAAGAGG-3'<br>(R) 5'-CTGAAACCAAGTCTGCATAG-3'        |
| <i>VILI</i>   | (F) 5'-GCAGCATTACCTGCTCTACGTT-3'<br>(R) 5'-GCTTGATAAGCTGATGCTGTAATTT-3'          | <i>OAS1</i>   | (F) 5'-TGTCCAAGGTGGTAAAGGGTG-3'<br>(R) 5'-CCGGCGATTAACTGATCCTG-3'        |
| <i>ALPI</i>   | (F) 5'-CATGGACCGCTTCCATA-3'<br>(R) 5'-GGCACCTGTCTGTCCACAT-3'                     | <i>MX1</i>    | (F) 5'-GTTTCCGAAGTGGACATCGCA-3'<br>(R) 5'-CTGCACAGGTTGTTCTCAGC-3'        |
| <i>LYZ</i>    | (F) 5'-CCGCTACTGGTGTA ATGATGG-3'<br>(R) 5'-CATCAGCGATGTTATCTTGCAG-3'             | <i>HERC5</i>  | (F) 5'-CAGAAAGTTGAATTTGTCGC-3'<br>(R) 5'-CTGAGTCACTCTATACCCAAC-3'        |
| <i>MUC2</i>   | (F) 5'-GCCAGCTCATCAAGGACAG-3'<br>(R) 5'-GCAGGCATCGTAGTAGTGTG-3'                  | <i>IL-6</i>   | (F) 5'-GGTACATCCTCGACGGCATCT-3'<br>(R) 5'-GTGCCTCTTTGCTGCTTTCAC-3'       |
| <i>CHGA</i>   | (F) 5'-TGACCTCAACGATGCATTTTC-3'<br>(R) 5'-CTGTCCTGGCTCTTCTGCTC-3'                | <i>IL-8</i>   | (F) 5'-GGCACAAACTTTCAGAGACAG-3'<br>(R) 5'-ACACAGAGCTGCAGAAATCAGG-3'      |
| <i>LGR5</i>   | (F) 5'-CTCCCAGGTCTGGTGTGTTG-3'<br>(R) 5'-GAGGTCTAGGTAGGAGGTGAAG-3'               | <i>IP-10</i>  | (F) 5'-GAAATTATTCCTGCAAGCCAATTT-3'<br>(R) 5'-TCACCTTCTTTTTTCATTGTAGCA-3' |
| <i>IFN-α</i>  | (F) 5'-AGAATCACTCTCTATCTGAAAGAGAAGAAATA-3'<br>(R) 5'-TCATGATTTCTGCTCTGACAACCT-3' | <i>TNF-α</i>  | (F) 5'-GGCTCCAGGCGGTGCTTGTTTC-3'<br>(R) 5'-AGACGGCGATGCGGCTGATG-3'       |
| <i>IFN-β</i>  | (F) 5'-GCCGCATTGACCATCT-3'<br>(R) 5'-AGGAGTACAGTCACTGTG-3'                       | <i>RANTES</i> | (F) 5'-CCCCTCACTATCCTACC-3'<br>(R) 5'-TCACGCCATTCTCCTG-3'                |
| <i>IFN-γ</i>  | (F) 5'-CTAATTATTCGGTAACTGACTTGA-3'<br>(R) 5'-ACAGTTCAGCCATCACTTGGA-3'            | <i>IL-1β</i>  | (F) 5'-AAGCTGATGGCCCTAAACAG-3'<br>(R) 5'-AGGTGCATCGTGCACATAAG-3'         |
| <i>IFN-λ1</i> | (F) 5'-CACATTGGCAGGTTCAAATCTCT-3'<br>(R) 5'-CCAGCGGACTCCTTTTGG-3'                | <i>IL-18</i>  | (F) 5'-GCTTGAATCTAAATTATCAGTC-3'<br>(R) 5'-GAAGATTCAAATTGCATCTTAT-3'     |
| <i>IFN-λ2</i> | (F) 5'-TCCAGTCAACGGTCAGCA-3'<br>(R) 5'-CAGCCTCAGAGTGTTCCTTCT-3'                  | <i>MCP-1</i>  | (F) 5'-CCCCAGTCACTGTGTTAT-3'<br>(R) 5'-TGGAACTCTGAACCCACTTC-3'           |
| <i>IFN-λ3</i> | (F) 5'-TAAAGAGGGCCAAAGATGCCTT-3'<br>(R) 5'-CTGGTCCAAGACATCCCCC-3'                | <i>MIP-1α</i> | (F) 5'-CTCTGCACCATGGCTCTGTCAAC-3'<br>(R) 5'-TGTGGAATCTGCCGGGAGGTGTAG-3'  |
| <i>IFIT1</i>  | (F) 5'-TTGATGACGATGAAATGCCTGA-3'<br>(R) 5'-CAGGTCACCAGACTCCTCAC-3'               | <i>Pan-EV</i> | (F) 5'-GCCCCCTGAATGCGGCTAAT-3'                                           |
| <i>OASL</i>   | (F) 5'-GTACCAGCAGTATGTGAAAG-3'<br>(R) 5'-ATGGTTAGAAGTTCAAGAGC-3'                 | <i>VP1</i>    | (R) 5'-ATTGTCACCATAAGCAGYCA-3'                                           |
|               |                                                                                  | Probe         | 5'-FAM-CGGACACCCAAAGTAGTCGGTTCCG-IABkFQ-3'                               |
